1     **The Patient Safety Curriculum: An Interventional Study on the Effectiveness of Patient Safety**  
2                                     **Education for Jordanian Nursing Students**

3             <sup>1</sup>Ahmad H. Al-Nawafleh\*

4             <sup>2</sup>Sultan Musleh

5             <sup>3</sup>Nofal Nawafleh

6

7

8

9

10

11             <sup>1</sup> Associate Professor of Nursing Management and Leadership, Faculty of Nursing,  
12             Mutah University, email: [alnawafleh@mutah.edu.jo](mailto:alnawafleh@mutah.edu.jo)

13             <sup>2</sup> Associate Professor of Adult Health Nursing, Faculty of Nursing, Mutah University.  
14             Email: [sultanmosleh@yahoo.com](mailto:sultanmosleh@yahoo.com); [s.mosleh@mutah.edu.jo](mailto:s.mosleh@mutah.edu.jo)

15             <sup>3</sup> Medical Student, Faculty of Medicine, Mutah University. Email:  
16             [nofal.nawafleh@yahoo.com](mailto:nofal.nawafleh@yahoo.com)

17

18     **\* Corresponding author:**

19     Ahmad H. Al-Nawafleh (Associate Professor of Nursing Management and Leadership,

20     Faculty of Nursing, Mutah University, Phone: +962797402080, email:

21     [alnawafleh@mutah.edu.jo](mailto:alnawafleh@mutah.edu.jo)



## 50 **Introduction**

51 Patient safety and nursing mistakes are now a global concern for providing high quality health  
52 care. In 1999, the Institute of Medicine (IOM) released a starting report on the number of deaths  
53 caused by medical errors annually in the United States (1). According to the report titled “*To Err Is*  
54 *Human: Building a Safer Health System*”, by the IOM, It was approximately that medical errors  
55 caused around 98,000 fatalities on a yearly basis (1, 2, 3). The report warns policy makers,  
56 hospitals, health care staff and patients about the main problems related to patient safety. The  
57 global focus on mitigating the negative impacts of healthcare is of utmost importance, and in the  
58 last ten years, there has been significant increase in patient safety efforts due to advances in patient  
59 safety sciences (4, 5, 6, 7, 8). While, it is impossible to predict when a patient harm may occur,  
60 there are measures that can be considered to prevent it from happening again. Healthcare  
61 professionals and organizations should learn from previous mistakes to avoid future commitments  
62 of them.

63 However, the provision of healthcare in certain situations continues to be potentially dangerous  
64 despite earlier efforts (9, 10). Patient safety experts conclude that a major reform of nursing  
65 education in nursing schools and resident training programmes is essential for essential  
66 improvements in patient safety (11, 12, 13).

67 Despite the significance of ensuring patient safety and the necessity of raising awareness about it,  
68 only a small number of educational institutions include this subject in their syllabus (6, 11, 14).  
69 Historically, the educational program for nursing and medical students has concentrated  
70 exclusively on practical abilities; such as identifying illness, providing treatments, providing post  
71 treatment care and monitoring (9, 12, 15, 16). However, the concepts of communication skills, root  
72 cause analysis, system thinking, human factor science has been disregarded to a great extent (14,  
73 17, 18). It is essential for patient safety that all nursing students at the undergraduate level to

74 possess all these essential skills and the required proficiency to reduce any harm to patients (3, 10).  
75 It is urgent to integrate knowledge and skills about patient safety in the health care field into the  
76 nursing student curriculum.

77 In Jordan, nursing education has been identified as a priority and efforts have been made to  
78 improve the quality of nursing education. The PSC was introduced into undergraduate nursing  
79 programs in Jordan as a strategy to improve patient safety education for nursing students (19). This  
80 study aimed to examine the impact of PSC on nursing students' knowledge, skills, and attitudes  
81 towards patient safety. This curriculum design is based on the patient safety guide proposed by the  
82 World Health Organization (4).

### 83 **Background**

84 There is no formal educational training specifically for patient safety in Jordanian universities'  
85 nursing programs up to the time of writing this report. However, the topic of patient safety is  
86 mentioned sporadically in the nursing curriculum, often related to ensuring that the student nurses  
87 are being competent in their practice (19, 20, 21).

88 There is now a new drive to reform the nursing curriculum in our institution to ensure that we  
89 incorporate the most relevant teaching topics but also use the most appropriate teaching methods.  
90 Patient safety, along with other topics such as palliative care and health information systems, is on  
91 the top list of topics that we need to integrate into our curriculum. Therefore, “the Multi-  
92 professional Patient Safety Curriculum Guide” (4) was a good opportunity to start working in this  
93 direction.

94 The opportunity to participate in this worldwide assessment as a “Complementary Test Site” is  
95 open to all schools and universities that specialize in nursing, dentistry, medicine, midwifery,  
96 pharmacy, and other healthcare professions (4). These institutions should be interested in  
97 incorporating topics from this guide that were adopted in similar studies (15, 17, 22, 23). These

98 universities and schools should be recognized by the national regulatory bodies of their country  
99 and be able to demonstrate an interest in teaching patient safety (4).

100 The university under study is now reforming its curriculum for preregistration nursing training  
101 according to the University Deans Council recommendations. The new curriculum includes new  
102 topics to be taught to prospective students, such as palliative care, end-of-life care and patient  
103 safety. Therefore, the current guide provides an important tool for the university to utilize in  
104 integrating patient safety education into our pre-registration nursing curriculum.

105 This study aims to evaluate the effectiveness of teaching the WHO PSC to undergraduate nursing  
106 students in the Jordanian context. Therefore, it has two objectives; to determine:

- 107 • The value of the curriculum guide for students. The usability of the curriculum guide as an  
108 educational tool for health education in universities and schools in Jordan.
- 109 • Impact/effect of the curriculum guide on student knowledge of patient safety in Jordan.

110

## 111 **Literature Review**

112 The WHO PSC Guide: “the multi-professional edition” provides a common platform for nurses to  
113 address their role to play in improving patient safety (4). Although nursing professionals must  
114 ensure the practice does not harm, evidence indicates that nursing education is still lagging to  
115 integrate patient safety into their curriculum (16). Therefore, this guide highlights understanding of  
116 the need to integrate the safety of patients into undergraduate nursing curriculum.

117 Huang and her colleagues (24) explored the factors that affect the competence of PS of nursing  
118 students who completed a national online survey. They recruited 732 Chinese students during 2018  
119 and 2019 across various locations (24). The main outcome factor was the rating of the patient

120 safety survey. The study found that Chinese nursing graduates showed moderate confidence in  
121 their clinical safety skills, but lacked confidence in areas such as learning about socio cultural or  
122 context dependent patient safety (PS) and discussing PS related topics like effective  
123 communication and understanding human and environmental factors (24) . Additionally, less than  
124 half of the participants felt comfortable talking to individuals who engaged in unsafe practices and  
125 expressing concerns about adverse reactions. Overall, these findings shed a light on the PS skills of  
126 Chinese nursing graduates.

127 In a study conducted by Suliman (25), the level of PS literacy among nursing students in two  
128 Jordanian universities was assessed. The study found that PS issues are not given much importance  
129 in the nursing education and curricula in Jordan. The study was conducted through a cross-  
130 sectional survey involving 297 nursing students. The results indicated that the students had  
131 moderate satisfaction with their knowledge and skills on most parameters. They were more  
132 confident in the knowledge and skills learned in the classroom compared to clinical training.  
133 Additionally, senior students lacked confidence in their knowledge and skills, particularly when it  
134 comes to writing medical error reports. The study suggests that contextual and sociocultural issues  
135 related to PS should be emphasized in the nursing curriculum to enhance students' competence in  
136 speaking up when they witness healthcare errors (25). To bridge the gap between theory and  
137 practice, the study recommends adding PS elements to the nursing curriculum.

138 A study was conducted in Jordan to measure the perceptions of PS during four consecutive  
139 semesters (19). It emphasised the inclusion of PS in training programmes and nursing education.  
140 PS in the nursing curriculum will emphasise the importance of reducing medical errors,  
141 highlighting clinical excellence, and improving health outcomes. The study was a survey of 158  
142 nursing students in their final year. It found that only 25% of the participants had used an incident  
143 report for the errors they observed. However, during their practice in clinical practice, 62% of  
144 students.

145

## 146 **Justification of the Study**

147 Patient safety is becoming a standard that is common in global and local healthcare practice.  
148 However, many nurses still do not adequately practice it. Furthermore, it is not widely taught to  
149 nursing students (16). The WHO developed a curriculum to help the nurses of the future to  
150 practice PS and thus help create a culture of safety for all patients (4).

151 It is important when adopting a training curriculum to find out whether the students can achieve  
152 the competencies required after its application. Furthermore, it is important to find out how the  
153 training will fit into the curriculum of the nursing program. As a result, nurses' programme  
154 developers should have a list of core training objectives based on agreed core competencies and  
155 examples of training programs selected by teachers on the basis of the core training objectives and  
156 target groups. When designing a training program, the developer must decide which of these skills  
157 should be taught. Selecting a level depends on the expected level of competence and  
158 characteristics of the student (e.g. previous training in PSC, research methods, epidemiology and  
159 statistics), as well as the level of training necessary to establish basic knowledge and  
160 understanding of nursing.

161

## 162 **Methods**

163 Interventional study adopting the pre-test and post-test method. The intervention was based on the  
164 WHO PSC guide for multidisciplinary health professions (4, 13, 16, 17). We taught selected topics  
165 from this curriculum to all nursing students as part of several courses during their studies. The  
166 methodology involved administering pre-test and post-test questionnaires to students to assess  
167 their self-awareness of PS before and after the curriculum.

## 168 **Study Setting and Sample**

169 The participants who took part in the investigation were nursing students from a public university  
170 located in Jordan. Those contacted during the first semester of 2019-2020. A total of 373 students  
171 attended this PS program and their perception changes to the PS program were surveyed before  
172 and after the programme.

## 173 **The Curriculum**

174 The WHO developed training and we have chosen two topics from 11 topics because of limited  
175 funding and resources. We conducted training on topic 1: what is patient safety? and topic 9:  
176 Infection prevention and control (World Health Organization 2001)(16). The lectures were  
177 originally designed by the WHO team, but we adapted them to our Jordanian situation using  
178 contemporary health incidents as illustrative cases. These incidents were handled individually by  
179 our staff, who were able to provide detailed analysis and real management strategies.

## 180 **The Study Tool:**

181 The survey used in the research was adapted and modified with permission from the WHO and  
182 the investigation was conducted adhering to their established protocols (4). It consisted of 23 items  
183 that were organized into four groups or composites. The first composite consisted of seven items  
184 and was focused on assessing the student's knowledge of PS. The second composite assessed the  
185 Safety of the Healthcare System and was made up of five items. The third composite that  
186 evaluated the student's ability to influence PS contained seven items. Finally, Composite 4 which  
187 was composed of four items, focused on the students' Personal Attitudes to PS. To rate the  
188 students' responses, a 5-point ordinal scale was used, with "1" indicating "strongly disagree/very  
189 poor" and "5" indicating "strongly agree/very good" (4).

190 Knowledge questions were used to determine what students have learnt about PS. Two to three  
191 knowledge questions have been used for each of the topics of the curriculum guide. Students have



192 been asked the knowledge questions at the start of the courses on PS topics to establish baseline  
193 data on students' knowledge. Their responses to the knowledge questions at the end of the study  
194 were compared with baseline data, to quantify changes in student knowledge as a result of their  
195 learning certain PS topics.

## 196 **Study Ethics and Actions**

197 The study was approved by the university, the Scientific Research Ethics Committee, with  
198 reference number (SREC-7-2019). A voluntary self-guided survey was conducted among 373  
199 nursing students. The survey was conducted during September 2019 and three months later during  
200 December 2019. Both were given during the entire class in the lecture room. Students have about  
201 10-25 minutes to complete the questionnaire. The consent to take part in the study was voluntary  
202 and granted before the student responded to the questionnaire based on information given orally  
203 during the class.

204

## 205 **Analysis**

206 SPSS ver.25 was used to analyse the data. Descriptive statistics and paired t-tests were used in data  
207 analysis.

## 208 **Results**

209 The study invited 373 students to participate, and 253 (68%) questionnaires were returned for the  
210 pre-test. Two months after the last learning session or three months after the first session, 218  
211 (58%) completed and returned the post-test questionnaire. Only forty students (16%) reported  
212 having prior exposure to PS training, while 172 (68%) acknowledged that their university had  
213 taught PS content.

214 **Insert Figure 1 here**

215 Table 1: Demographic data

|                                                                   |          | <b>Frequency</b> | <b>Percentage %</b> |
|-------------------------------------------------------------------|----------|------------------|---------------------|
| <b>Study level</b>                                                | 2nd year | 92               | 36.2                |
|                                                                   | 3rd year | 65               | 25.6                |
|                                                                   | 4th year | 93               | 36.6                |
| <b>Has patient safety been taught in your university /school?</b> | Yes      | 172              | 67.7                |
|                                                                   | No       | 80               | 31.5                |
| <b>Have you previously taken a patient safety course?</b>         | Yes      | 40               | 15.7                |
|                                                                   | No       | 206              | 81.1                |

216 Source: study data

217

### 218 **Students' attitudes before patient safety training**

219 Before the training courses took place, Table 2 illustrates the knowledge, skills, and attitudes  
220 (KSA) that the students had about PS. The feedback from the students indicated low level of  
221 knowledge in the first composite regarding PS except for factors that contribute to human error or  
222 influence PS, where they possessed moderate knowledge. The second composite is the Safety of  
223 the Healthcare System evaluated by five items. Most of the students reported a neutral position  
224 although some agreed and others disagree. In response to the third composite, the students agree  
225 that they can influence PS. The items measure their influence, which may indicate attitude rather  
226 than knowledge. This is confirmed by the student's responses to the last composite, as all students  
227 indicated that they strongly agree on personal attitudes toward PS.

228

### 229 **Student attitudes after patient safety training**

230 In Table 2 the results of the PS perception survey are presented. Students who had a moderate  
231 understanding of the factors that affect PS achieved the highest scores (mean 3.45, SD 0.94). In  
232 contrast, the lowest score was related to the role of health institutions in error reporting (mean  
233 1.90, SD= 0.97). This indicates insufficient knowledge among students about the role of healthcare

234 institutions in reporting errors. Additionally, the students received a low score in reporting error.  
235 Following the completion of the training, the students' knowledge about patient safety improved  
236 significantly, and most items receiving scores greater than three, indicating good knowledge. After  
237 the training, five out of seven items showed significant improvements, with the most improvement  
238 observed in the role of healthcare organizations in error reporting (the mean difference was 0.97,  
239  $P=0.001$ ).

240 **Table 2: Composite 1- Knowledge of Patient Safety**

| Survey Item                                                        | Pre-Training |       | Post-Training |           | Correlation | p value |
|--------------------------------------------------------------------|--------------|-------|---------------|-----------|-------------|---------|
|                                                                    | Mean         | SD    | Mean          | SD        |             |         |
| <b>1. Different types of human error in health care</b>            | 2.92         | .917  | 3.27          | .872      | .034        | .619    |
| <b>2. Factors contributing to human error</b>                      | 2.98         | .925  | 3.43          | .854      | .175        | .010    |
| <b>3. Factors influencing patient safety</b>                       | 3.45         | .940  | 3.65          | .801      | .129        | .057    |
| <b>4. Ways of speaking up about error</b>                          | 2.67         | 1.081 | 3.18          | .877      | .182        | .008    |
| <b>5. What should happen if an error is made</b>                   | 2.78         | 1.012 | 3.26          | 1.05<br>3 | .151        | .027    |
| <b>6. How to report an error</b>                                   | 2.34         | 1.144 | 2.92          | 1.10<br>5 | .263        | .000    |
| <b>7. The role of health-care organizations in error reporting</b> | 1.90         | .974  | 2.87          | 1.12<br>9 | .241        | .000    |

241 Source: study data

242 Comparing the means for students' knowledge of the safety of the health care system before and  
243 after teaching the curriculum indicates an increase. For example, healthcare personnel who receive  
244 PS training scored 2.94 before and 3.13 after training with a standard deviation of (1.07 and 0.97)  
245 consequently. However, this increase is not statistically significant when we asked the students  
246 (Item 4) how often the patients received the wrong drug. (see Table 3).

247

248

249 **Table 3: Composite 2- Safety of the Health care System**

| Survey Item                                                        | Pre-Training |       | Post-Training |       | Correlation | p value |
|--------------------------------------------------------------------|--------------|-------|---------------|-------|-------------|---------|
|                                                                    | Mean         | SD    | Mean          | SD    |             |         |
| 1. Most health-care workers make errors                            | 3.33         | .988  | 3.51          | .947  | .257        | .000    |
| 2. In my country there is a safe system of healthcare for patients | 2.94         | .958  | 2.88          | .926  | .236        | .000    |
| 3. Medical error is very common                                    | 3.77         | .945  | 3.74          | .906  | .168        | .013    |
| 4. It is very unusual for patients to be given the wrong drug      | 2.77         | 1.070 | 2.91          | 1.118 | .053        | .440    |
| 5. Health-care staff receive training in patient safety            | 2.94         | 1.071 | 3.13          | .975  | .211        | .002    |

250 Source: study data

251 The results of students' influence on safety are not indicating a clear picture. There is a slight  
 252 increase in the student's ability to talk or tell others about an error they made. This result is  
 253 statistically significant. Students strongly believed that reporting the error will improve PS, scored  
 254 as highest (mean=3.93, SD1.009), students also always ensure that their PS is maintained. After  
 255 training, the only significant change was in the ability of the students to report their errors (items 1  
 256 & 7) (see Table 4).

257 **Table 4: Composite 3-Personal Influence over Safety**

| Survey Item                                                                                          | Pre-Training |       | Post-Training |       | Correlation | p value |
|------------------------------------------------------------------------------------------------------|--------------|-------|---------------|-------|-------------|---------|
|                                                                                                      | Mean         | SD    | Mean          | SD    |             |         |
| 1. Telling others about an error I made would be easy.                                               | 3.35         | 1.206 | 3.51          | 1.030 | .189        | .005    |
| 2. It is easier to find someone to blame rather than focus on the causes of error.                   | 2.07         | 1.104 | 2.24          | 1.074 | .103        | .131    |
| 3. I am confident about speaking to someone who is showing a lack of concern for a patient's safety. | 3.48         | 1.153 | 3.42          | 1.005 | .060        | .377    |
| 4. I know how to talk to people who have made an error.                                              | 3.36         | 1.009 | 3.32          | .951  | .125        | .067    |
| 5. I am always able to ensure that patient safety is not compromised.                                | 3.89         | 1.040 | 3.85          | .905  | .037        | .591    |
| 6. I believe that filling in reporting forms will help to improve patient safety.                    | 3.93         | 1.009 | 3.90          | .883  | .080        | .240    |
| 7. I am able to talk about my own errors.                                                            | 3.60         | 1.026 | 3.76          | .975  | .252        | .000    |

258 Source: study data

259 Personal attitude towards PS did not show a significant change apart from the recognition by  
 260 students of the importance of learning how best to deal with their errors by the end of nursing  
 261 school (mean= 4.23 & SD=.8) (see Table 5). All other items were not significant, and they indicate  
 262 a decrease, too.

263 **Table 5: Composite 4- Personal Attitudes to Patient Safety**

| Survey Item                                                                                                      | Pre-Training |      | Post-Training |      | Correlation | p value |
|------------------------------------------------------------------------------------------------------------------|--------------|------|---------------|------|-------------|---------|
|                                                                                                                  | Mean         | SD   | Mean          | SD   |             |         |
| 1. By concentrating on the causes of incidents I can contribute to patient safety.                               | 4.13         | .775 | 4.04          | .727 | .130        | .056    |
| 2. If I keep learning from my mistakes, I can prevent incidents.                                                 | 4.45         | .665 | 4.24          | .836 | .063        | .353    |
| 3. Acknowledging and dealing with my errors will be an important part of my job.                                 | 4.21         | .775 | 4.15          | .826 | .065        | .339    |
| 4. It is important for me to learn how best to acknowledge and deal with my errors by the end of nursing school. | 4.49         | .687 | 4.23          | .805 | .206        | .002    |

264 Source: study data  
 265

## 266 Discussion

267 The study findings demonstrated that implementing the WHO PSC had a beneficial effect on the  
 268 attitudes and knowledge of undergraduate nursing students regarding PS. The pre-test scores  
 269 revealed that the participants had a positive attitudes and moderate level of knowledge towards PS.  
 270 However, after the intervention, the post-test scores showed an increase in their knowledge and  
 271 positive attitudes towards PS. These results are consistent with previous studies that have reported  
 272 the effectiveness of PS education in enhancing healthcare providers' knowledge and attitudes of  
 273 toward PS (12, 19, 26). The study results underscore the need for formal PS education and  
 274 highlight the importance of improving overall safety competence and health outcomes (11).

275 According to this study, students' ability to identify and talk about their mistakes improved  
276 significantly after training. However, their perception towards PS showed a significant change as  
277 well, as they recognized the importance of learning how to deal with their errors by the end of their  
278 nursing education. This finding is consistent with Suliman (25) research which found that PS is not  
279 given enough importance in Jordanian nursing education and curricula. The students had more  
280 confidence in their knowledge and skills acquired in the classroom than their practical training in  
281 clinical settings, particularly in writing medical error reports (24, 25). The study concludes that  
282 contextual and sociocultural issues related to PS should be emphasized in nursing curriculum to  
283 enable students to speak up when they observe healthcare errors. To achieve this, it is  
284 recommended that PS elements be added to bridge the gap between theory and practice in the  
285 nursing curriculum (25).

286

287 Study limitations:

288 Although we obtained a significant difference in the measures before/after teaching the PSC, This  
289 is probably not ultimate, the curriculum probably caused the increase in KSA of PS. Other  
290 variables may have also influenced this increase (16, 19). The passage of time between the pre-test  
291 and post-test without curriculum teaching could have contributed to this change. Other events may  
292 also occur during this period that influenced the students' KSA about PS. Perhaps, the students  
293 were exposed to PS training in clinical settings or informally by the instructors. This means that  
294 there is a possibility of contamination from any source that was not under the control of this study  
295 (7, 27).

296 In this study, we used measures to anticipate any confounding factors during the research design.  
297 For example, we have asked whether the student has previously been exposed to PS training.  
298 However, the results of this study can be improved in future; if researchers use a control group that  
299 is not exposed to the intervention and differentiate between the intended intervention and other  
300 domains included in the curriculum. In addition, the intervention should be conducted by teachers

301 other than their regular course instructors to avoid using any of the materials during their normal  
302 course. This would assist in excluding the effects of time and other factors that could affect the  
303 study's results. This study only investigated two domains out of the 11 courses suggested by WHO  
304 (4). Therefore, the results may not be generalised to all other topics of the curriculum suggested by  
305 the WHO.

306

307 Implications:

308 A formal PSC adoption and its early integration into the undergraduate nursing curriculum were  
309 determined to be necessary according to this study. During the study, we also anticipated that  
310 teacher would need to become more involved in the creation and integration of PS in the  
311 curriculum. There is a good opportunity to use the "WHO Curriculum Resource Guide" in any  
312 attempt to develop an appropriate PSC. The attitude towards PS in academic culture must not only  
313 include students, but there has been resistance to implementation at different levels, even from the  
314 curriculum regulatory bodies. The WHO curriculum can be amended according to the culture of  
315 local institutions and can be properly implemented with the support of the relevant government  
316 authorities.

317 Future research should evaluate the usefulness of WHO's PSC in a wider and more diverse sample  
318 group to improve the universality of the results. Finally, it is recommended that more research to  
319 be done to determine how the WHO PSC has affected the patient outcomes and how it may reduce  
320 adverse reactions in clinical practice.

## 321 **Conclusion**

322 In conclusion, this study has shed important light on undergraduate nursing students' attitudes,  
323 knowledge and abilities concerning PS, both before and after training. The results indicate that the  
324 students had a low level of knowledge in some areas of PS before training, especially with regard  
325 to the role of healthcare institutions in reporting errors. However, the training using the WHO PSC

326 significantly improved the students' knowledge and attitudes in most PS areas, with the most  
327 significant improvement observed in the role of healthcare organization in error reporting. The  
328 curriculum was well received by the participants and they were confident in their ability to apply  
329 the knowledge acquired in their future clinical practice. This indicates the need to train nursing  
330 students on how to respond to healthcare errors in general, not only to provide safe bedside care to  
331 the patients. Overall, the study suggests that training programs can effectively improve students'  
332 KSA when included in the curriculum of nursing schools. The WHO PSC guide can be a great  
333 start in this domain, which is essential to improve the quality of healthcare services.

334

### 335 **Acknowledgement**

336 The authors thank the University of Mutha, special thanks go to the nursing academics  
337 who conducted the teaching and supported the study, and load of thanks to the study  
338 participants who completed the questionnaires and who took the time to participate in this  
339 study.

### 340 **References:**

- 341 1. Pierre MS, Grawe P, Bergstrom J, Neuhaus C. 20 years after To Err Is Human: A  
342 bibliometric analysis of 'the IOM report's' impact on research on patient safety. *Safety Science*.  
343 2022;147(20):105593.
- 344 2. Kohn LT, Corrigan JM, Donaldson MS. *To Err Is Human : Building a Safer Health System*.  
345 Washington, DC, USA: National Academies Press; 2000.
- 346 3. Sheehan P, Joy A, Fleming A, Vosper H, McCarthy S. Human factors and patient safety in  
347 undergraduate healthcare education: a systematic review. *Human Factors in Healthcare*.  
348 2022;2(1):100019.
- 349 4. World Health Organization. *Patient safety curriculum guide: multi-professional edition*.  
350 Geneva: World Health Organization; 2011. Contract No.: CC BY-NC-SA 3.0 IGO.
- 351 5. Kirwan M, Riklikiene O, Gotlib J, Fuster P, Borta M. Regulation and current status of  
352 patient safety content in pre-registration nurse education in 27 countries: Findings from the  
353 Rationing-Missed nursing care (RANCARE) COST Action project. *Nurse Education in Practice*.  
354 2019;37(1):132-40.
- 355 6. Wu AW, Busch IM. Patient safety: a new basic science for professional education. *GMS*  
356 *journal for medical education*. 2019;36(2):Doc21.
- 357 7. Cantero-López N, González-Chordá VM, Valero-Chillerón MJ, Mena-Tudela D, Andreu-  
358 Pejó L, Vila-Candel R, et al. Attitudes of undergraduate nursing students towards patient safety: a



- 359 quasi-experimental study. *International journal of environmental research and public health*.  
360 2021;18(4):1429.
- 361 8. Al-Nawafleh A, Abu-Helalah MA, Hill V, Masoud MI, Al-Mahasneh HA, Al Salti ET. Patient  
362 Safety Culture in Jordanian Hospitals. *Health Science Journal*. 2016;10(5):5.
- 363 9. Singh H, Mushtaq U, Marinez A, Shahid U, Huebner J, McGaffigan P, et al. Developing the  
364 Safer Dx Checklist of ten safety recommendations for health care organizations to address  
365 diagnostic errors. *The Joint Commission Journal on Quality and Patient Safety*. 2022;48(11):581-  
366 90.
- 367 10. Evans K, Athavale N, Long S, Vincent C. Patient safety. In: Morley JE, Vellas B, Sinclair AJ,  
368 Cesari M, Munshi M, editors. *Pathy's Principles and Practice of Geriatric Medicine*. 6th ed: Wiley-  
369 Blackwell; 2022. p. 146-64.
- 370 11. Lee SE, Morse BL, Kim NW. Patient safety educational interventions: a systematic review  
371 with recommendations for nurse educators. *Nursing open*. 2022;9(4):1967-79.
- 372 12. Torkaman M, Sabzi A, Farokhzadian J. The effect of patient safety education on  
373 undergraduate nursing students' patient safety competencies. *Community Health Equity*  
374 *Research & Policy*. 2022;42(2):219-24.
- 375 13. Ji Y, Lee H, Lee T, Choi M, Lee H, Kim S, et al. Developing an integrated curriculum for  
376 patient safety in an undergraduate nursing program: a case study. *BMC nursing*. 2021;20(1):1-11.
- 377 14. Myung SJ, Shin J-S, Kim JH, Roh H, Kim Y, Kim J, et al. The Patient Safety Curriculum for  
378 Undergraduate Medical Students as a First Step Toward Improving Patient Safety. *Journal of*  
379 *Surgical Education*. 2012;69(5):659-64.
- 380 15. Wahlberg KJ, Pay T, Repp AB, Wahlberg EA, Kennedy AG. Effect of Patient Safety  
381 Curriculum for Internal Medicine Residents on a Health Care System. *ATS scholar*. 2022;3(1):156-  
382 66.
- 383 16. Mansour M, Skull A, Parker M. Evaluation of World Health Organization multi-  
384 professional patient safety curriculum topics in nursing education: Pre-test, post-test, none-  
385 experimental study. *Journal of Professional Nursing*. 2015;31(5):432-9.
- 386 17. Lawal BK, Mohammed S. Integrating patient safety education into pharmacy curriculum  
387 in Nigeria. *Int J Pharm Pract*. 2022;30(6):583-5.
- 388 18. Sujan MA, Furniss D, Anderson J, Braithwaite J, Hollnagel E. Resilient Health Care as the  
389 basis for teaching patient safety – A Safety-II critique of the World Health Organisation patient  
390 safety curriculum. *Safety Science*. 2019;118:15-21.
- 391 19. AlNawafleh AH, Al-Momani M, Alhalaiqa F. Patient Safety Education: A Perspective of  
392 Southern Jordan Nursing Students'. *Mu'tah Lil-Buhuth wad-Dirasat*. 2022;37(2):49-67.
- 393 20. Salami I, Subih M, Darwish R, Al-Jbarat M, Saleh Z, Maharmeh M, et al. Medication  
394 Administration Errors: Perceptions of Jordanian Nurses. *Journal of Nursing Care Quality*.  
395 2019;34(2):E7-E12.
- 396 21. Albsoul RA, Safadi RR, Alshyyab MA, FitzGerald G, Hughes JA, Ahmad M. Missed Nursing  
397 Care in Medical and Surgical Wards in Jordan: A Cross-Sectional Study. *Policy, Politics, & Nursing*  
398 *Practice*.0(0):15271544231155845.
- 399 22. Alquwez N, Cruz JP, Alshammari F, Felemban EM, Almazan JU, Tumala RB, et al. A  
400 multi-university assessment of patient safety competence during clinical training among  
401 baccalaureate nursing students: A cross-sectional study. *Journal of clinical nursing*. 2019;28(9-  
402 10):1771-81.
- 403 23. Mansour MJ, Al Shadafan SF, Abu-Sneineh FT, AlAmer MM. Integrating patient safety  
404 education in the undergraduate nursing curriculum: a discussion paper. *The open nursing journal*.  
405 2018;12:125.
- 406 24. Huang FF, Shen XY, Chen XL, He LP, Huang SF, Li JX. Self-reported confidence in patient  
407 safety competencies among Chinese nursing students: a multi-site cross-sectional survey. *BMC*  
408 *medical education*. 2020;20(1):1-10.

- 409 25. Suliman M. Measuring Patient Safety Competence Among Nursing Students in the  
410 Classroom and Clinical Settings. *Nursing education perspectives*. 2019;40(3):E3-E7.
- 411 26. Lee SE, Dahinten VS. Evaluating a patient safety course for undergraduate nursing  
412 students: A quasi-experimental study. *Collegian*. 2023;30(1):75-83.
- 413 27. Kim YM, Yoon YS, Hong HC, Min A. Effects of a patient safety course using a flipped  
414 classroom approach among undergraduate nursing students: A quasi-experimental study. *Nurse*  
415 *Education Today*. 2019;79(1):180-7.
- 416

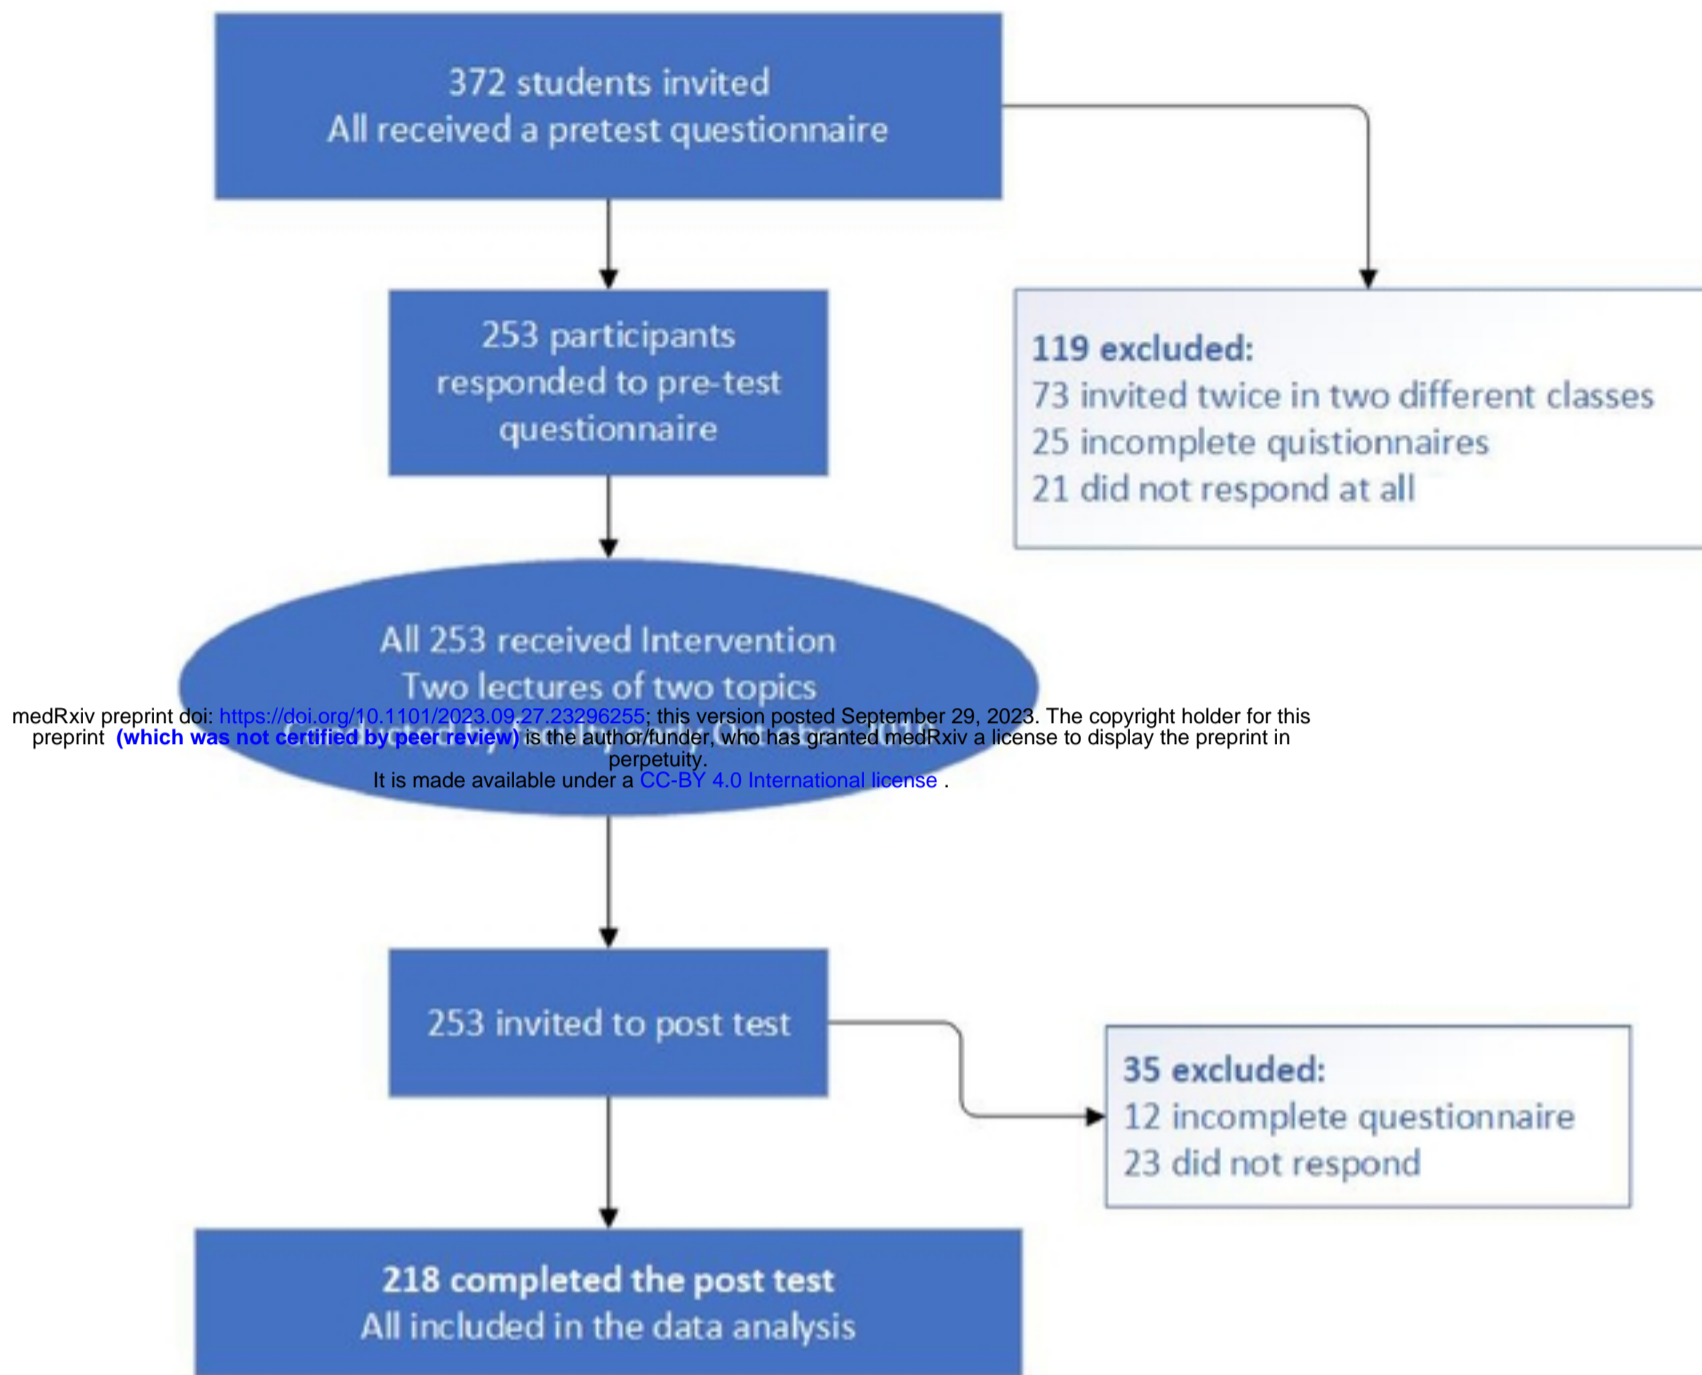

**Figure 1: study process flow chart**
